# Supplementary material for: Precipitation and soil microbial community influence plant response to warming and N addition in a desert steppe
Source: Research Square preprint supplement (doi:10.21203/rs.3.rs-1337752/v1), 2022-02-15
Supplement: Supplementary file 1 [file f0560830ba1b055457157d19.docx]

**Precipitation and soil microbial community influence plant response to warming and N addition in a desert steppe**

# SUPPLEMENTARY INFORMATION

**Figure S1** Precipitation in June, July and the whole year (2018).

**Figure S2** 0-10 cm soil temperature in 2018. Error bars show one standard error of the mean.

**Figure S3** Soil moisture under different treatments. Error bars show one standard error of the mean. Different letters in each treatment indicate significant difference among treatments (one-way ANOVA, *P* < 0.05).

**Figure S4** 0-10 cm soil pH in 2018. Error bars show one standard error of the mean. Different letters in each treatment indicate significant difference among treatments (one-way ANOVA, *P* < 0.05).

**Figure S5** Effects of warming and nitrogen addition on soil inorganic nitrogen at each sampling date. Error bars show one standard error of the mean. Different letters in each treatment indicate significant difference among treatments (one-way ANOVA, *P* < 0.05).


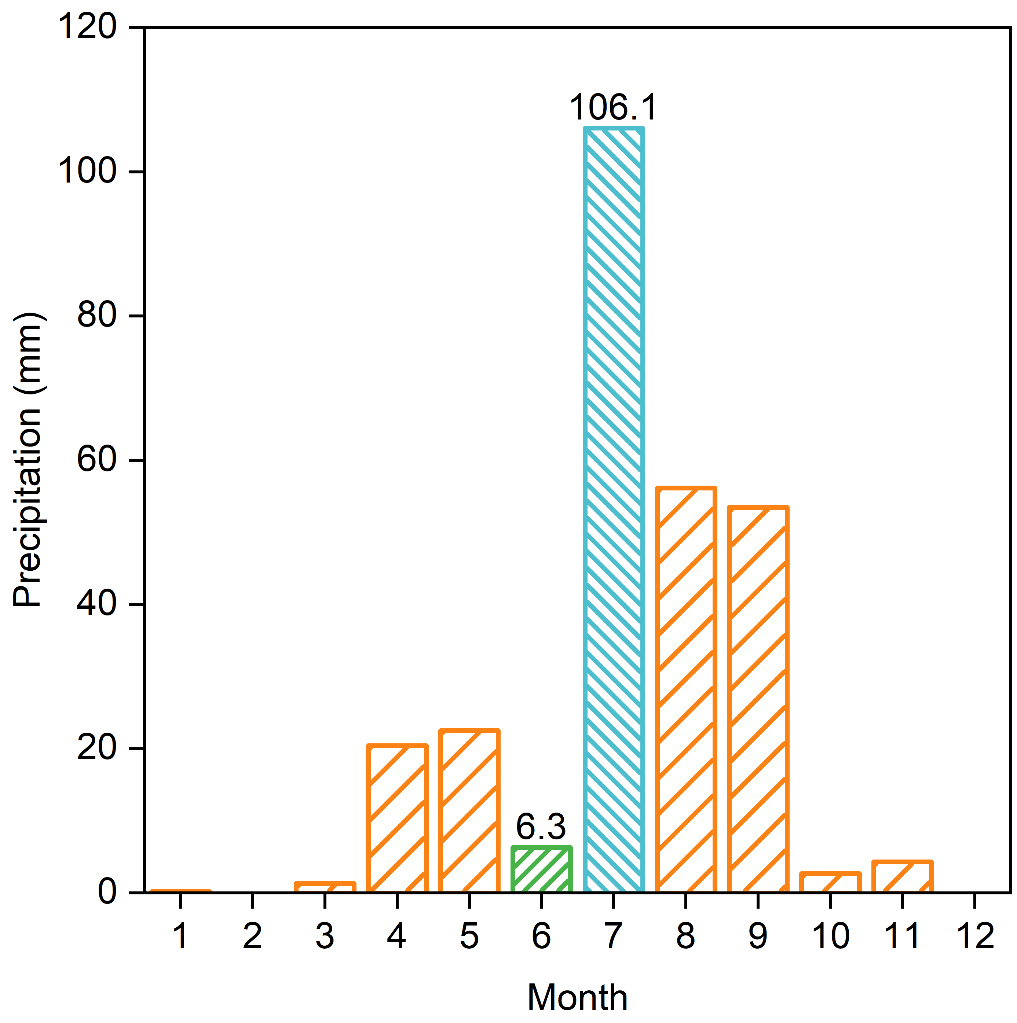


**Figure S1** Precipitation in June, July and the whole year (2018).


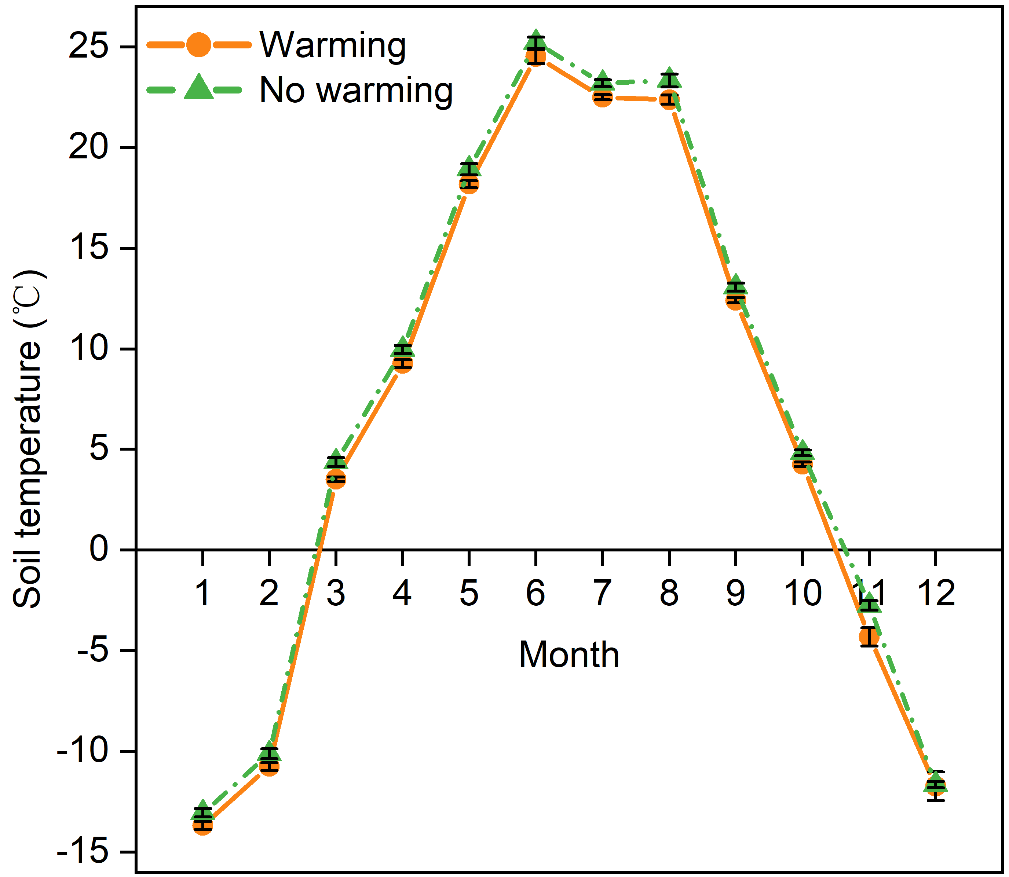


**Figure S2** 0-10 cm soil temperature in 2018. Error bars show one standard error of the mean.


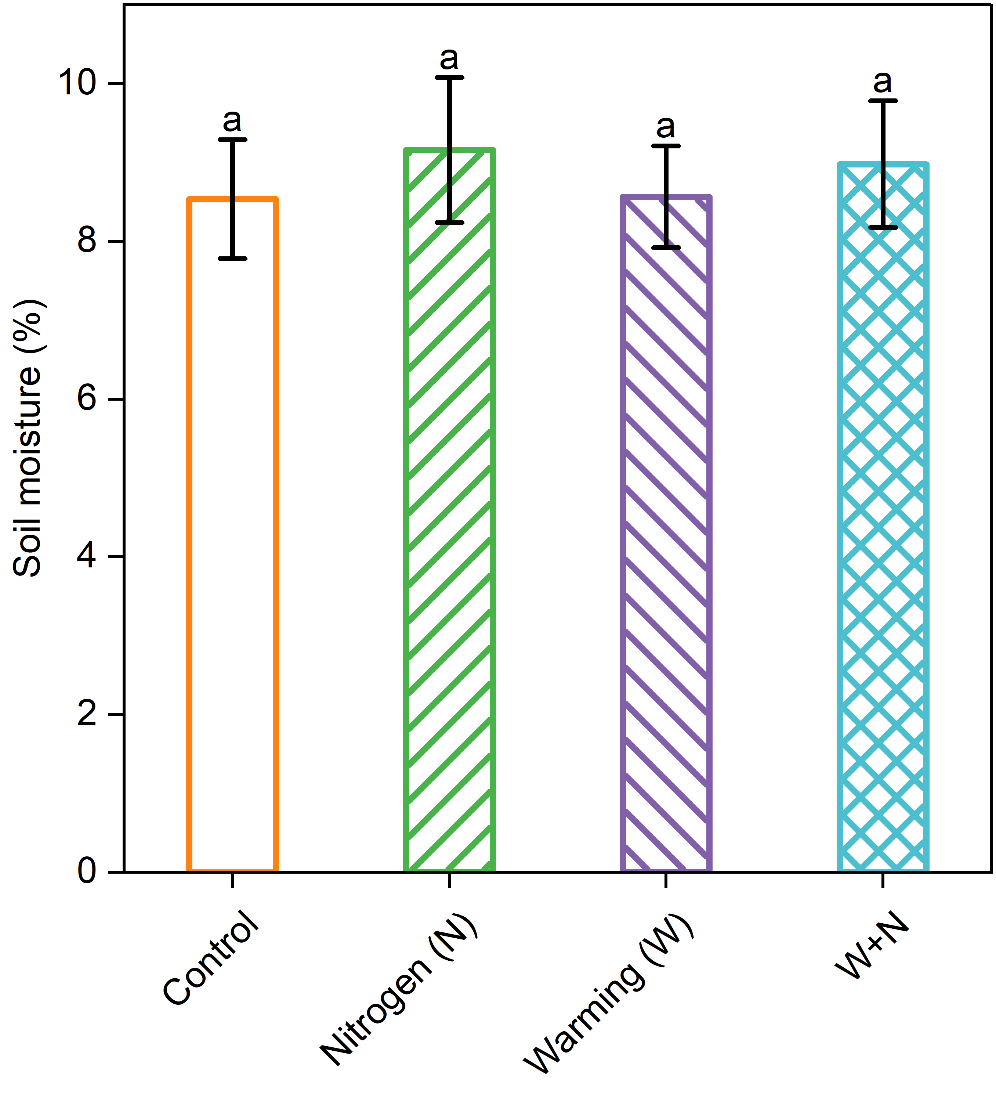


**Figure S3** Soil moisture under different treatments. Error bars show one standard error of the mean. Different letters in each treatment indicate significant difference among treatments (one-way ANOVA, *P* < 0.05).


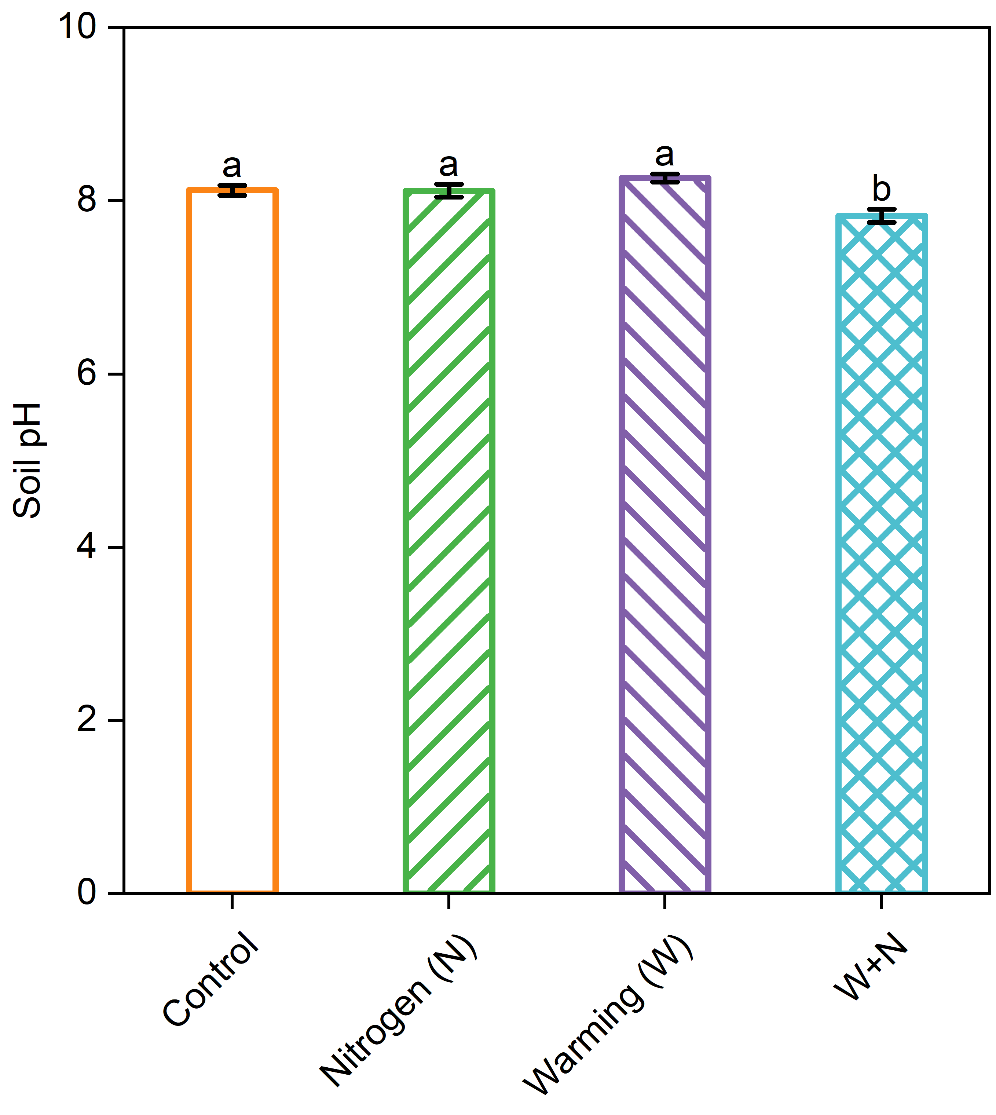


**Figure S4** 0-10 cm soil pH in 2018. Error bars show one standard error of the mean. Different letters in each treatment indicate significant difference among treatments (one-way ANOVA, *P* < 0.05).

**
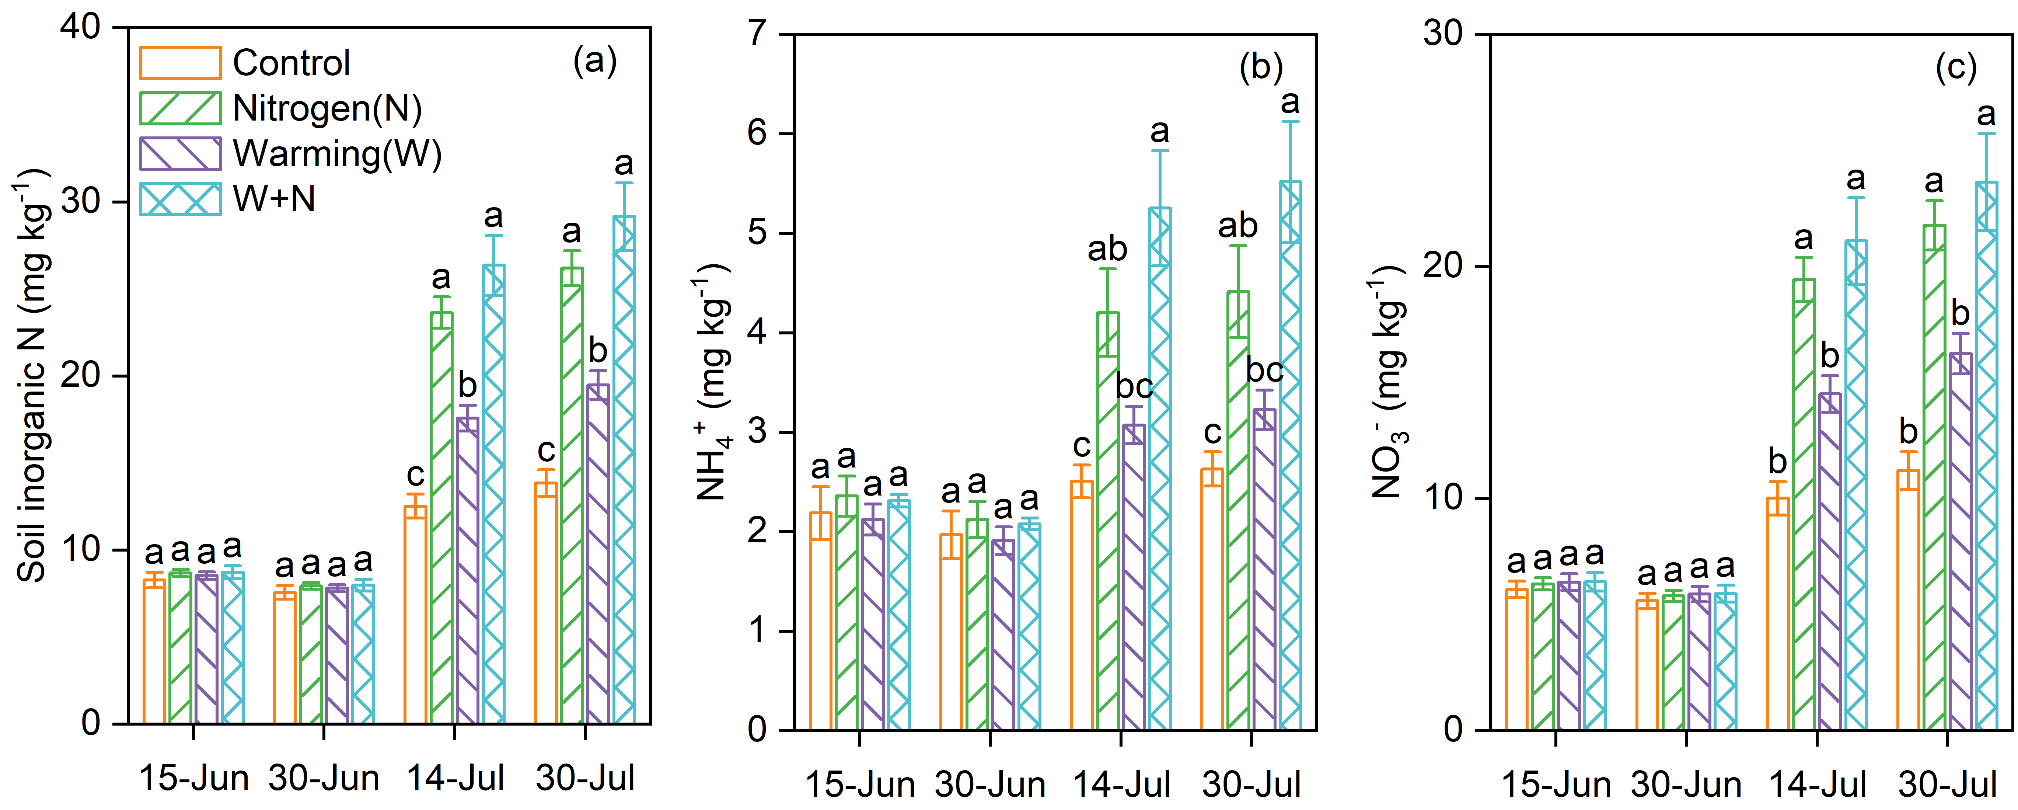
**

**Figure S5** Effects of warming and nitrogen addition on soil inorganic nitrogen at each sampling date. Error bars show one standard error of the mean. Different letters in each treatment indicate significant difference among treatments (one-way ANOVA, *P* < 0.05).

**Table S1** Effects of warming (W), N addition (N), month (M), and their interactions on soil temperature (ST, 2018), based on linear mixed-effects models.

|  | *df*1 | *df*2 | ST | pH |
| --- | --- | --- | --- | --- |
| Warming (W) | 1 | 15 | 73.19*** | 1.30 |
| Nitrogen (N) | 1 | 15 | 0.49 | 11.73** |
| W×N | 1 | 15 | 0.22 | 11.04** |
| Month (M) | 11 | 192 | 3444.08*** |  |
| W×M | 11 | 192 | 1.38 |  |
| N×M | 11 | 192 | 0.62 |  |
| W×N×M | 11 | 192 | 0.53 |  |

*Note*. The *F* ratios are presented together with their levels of significance. **P* < 0.05, ***P* < 0.01, ****P* < 0.001. *df*1 and *df*2 denote the numerator and denominator degrees of freedom, respectively.

**Table S2** Results from mixed model with a repeated-measures split-plot design on the effects of warming and N addition on soil moisture, inorganic N, microbial biomass and microbial PLFAs at each sampling date.

|  | | *df*1 | *df*2 | Inorganic N | MBC | MBN | MBC/MBN | Total FAs | FAs(B) | FAs(F) | F/B |
| --- | --- | --- | --- | --- | --- | --- | --- | --- | --- | --- | --- |
| 15-Jun | Warming (W) | 1 | 15 | 0.22 | 0.0004 | 0.37 | 0.54 | 0.32 | 0.29 | 0.08 | 0.01 |
| Nitrogen (N) | 1 | 15 | 0.89 | 0.03 | 0.09 | 0.10 | 1.67 | 0.29 | 0.03 | 0.00 |
| W×N | 1 | 15 | 0.10 | 0.05 | 4.04 | 4.35 | 3.81 | 1.13 | 0.002 | 0.21 |
| 30-Jun | W | 1 | 15 | 0.22 | 0.74 | 0.07 | 1.49 | 26.52*** | 28.47*** | 0.44 | 0.04 |
| N | 1 | 15 | 0.87 | 0.00005 | 0.11 | 0.02 | 0.07 | 0.25 | 0.07 | 0.04 |
| W×N | 1 | 15 | 0.11 | 0.43 | 1.10 | 0.93 | 3.72 | 3.39 | 0.05 | 0.002 |
| 14-Jul | W | 1 | 15 | 12.64** | 43.91*** | 40.68*** | 22.35*** | 36.86*** | 84.77*** | 11.33** | 95.47*** |
| N | 1 | 15 | 82.70*** | 61.05*** | 48.14*** | 18.15*** | 53.60*** | 119.73*** | 12.81** | 115.28*** |
| W×N | 1 | 15 | 1.16 | 0.22 | 26.97*** | 48.65*** | 29.56*** | 83.07*** | 10.56** | 91.96*** |
| 30-Jul | W | 1 | 15 | 12.31** | 80.81*** | 67.13*** | 27.03*** | 49.34*** | 123.37*** | 147.84*** | 490.95*** |
| N | 1 | 15 | 80.51*** | 92.75*** | 112.50*** | 38.83*** | 69.17*** | 214.29*** | 172.24*** | 615.28*** |
| W×N | 1 | 15 | 1.19 | 56.89*** | 1.42 | 0.003 | 31.49*** | 114.69*** | 154.51*** | 494.54*** |

*Note.* The *F* ratios are presented together with their levels of significance. **P* < 0.05, ***P* < 0.01, ****P* < 0.001. *df*1 and *df*2 denote the numerator and denominator degrees of freedom, respectively. SM represent soil moisture. MBC, MBN and MBC/MBN represent soil microbial biomass carbon, soil microbial biomass nitrogen and the ratio of MBC/MBN, respectively. Total FAs, FAs(B), FAs(F) and F/B represent the total the total FAs, bacterial FAs, fungal FAs and the ratio of fungi/bacteria of soil samples, respectively.

**Table S3** Results from mixed model with a repeated-measures split-plot design on the effects of warming and N addition on soil NH4+ and soil NO3- at each sampling date.

|  | | *df*1 | *df*2 | NH4+ | NO3- |
| --- | --- | --- | --- | --- | --- |
| 15-Jun | Warming (W) | 1 | 15 | 0.11 | 0.37 |
| Nitrogen (N) | 1 | 15 | 1.12 | 0.13 |
| W×N | 1 | 15 | 0.00 | 0.11 |
| 30-Jun | W | 1 | 15 | 0.12 | 0.37 |
| N | 1 | 15 | 1.10 | 0.13 |
| W×N | 1 | 15 | 0.00 | 0.10 |
| 14-Jul | W | 1 | 15 | 4.41 | 6.93* |
| N | 1 | 15 | 25.41*** | 46.75*** |
| W×N | 1 | 15 | 0.39 | 1.48 |
| 30-Jul | W | 1 | 15 | 4.42 | 6.93* |
| N | 1 | 15 | 25.40*** | 46.77*** |
| W×N | 1 | 15 | 0.39 | 1.47 |

*Note*. The *F* ratios are presented together with their levels of significance. **P* < 0.05, ***P* < 0.01, ****P* < 0.001. *df*1 and *df*2 denote the numerator and denominator degrees of freedom, respectively.
